# Supplementary material for: Removal of phosphate and chromium(vi) from liquids by an amine-crosslinked nano-Fe3O4 biosorbent derived from corn straw
Source: Royal Society of Chemistry journal article supplement (doi:10.1039/c6ra06801d), 2016-01-01
Supplement: c6ra06801d1.pdf [file c6ra06801d1.pdf]

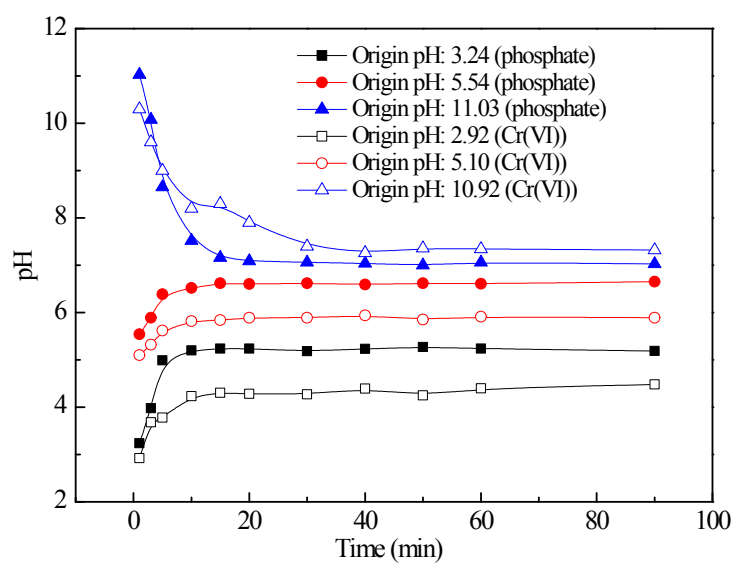

Fig. S1 pH changes during adsorption process

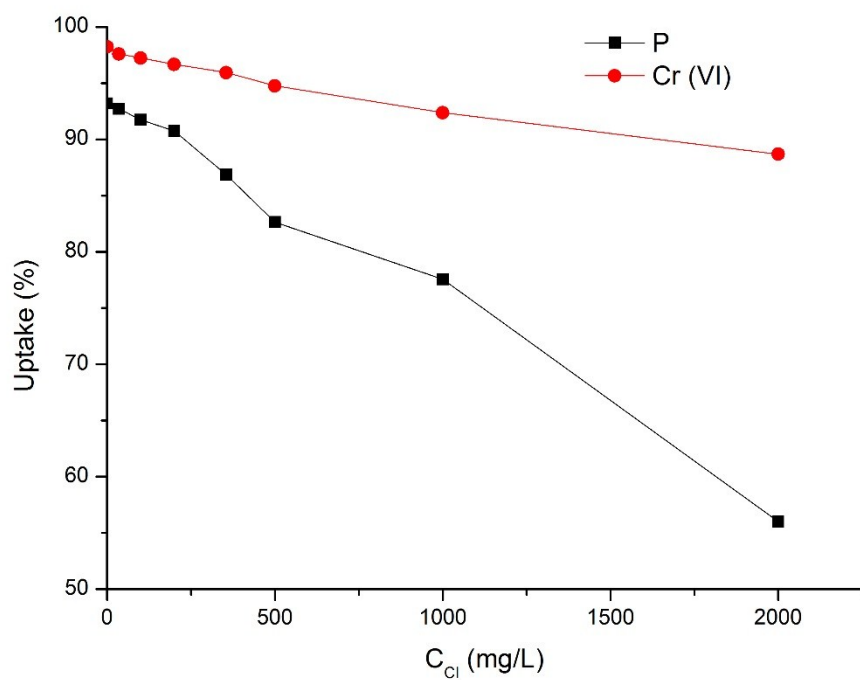

Fig. S2 Effect of ionic strength on Cr(VI) and phosphate adsorption (concentration: phosphate 20 mg P/L, Cr(VI) 50 mg Cr/L, contact time: 60 min, ACMCS dosage: 4 g/L, temperatures: 20°C)

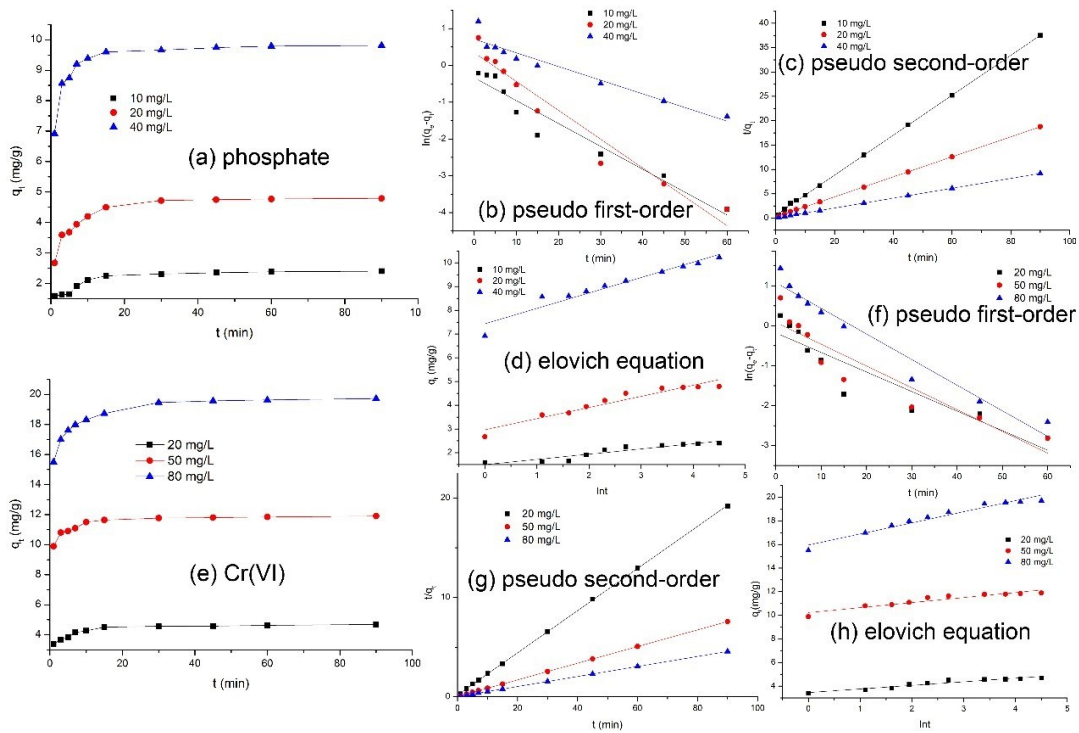

Fig. S3 (a) Adsorption kinetic of phosphate onto ACMCS; (b) Pseudo first-order (phosphate); (c) Pseudo second-order (phosphate); (d) Elovich (phosphate); (e) Adsorption kinetic of Cr(VI) onto ACMCS; (f) Pseudo first-order (Cr(VI)); (g) Pseudo second-order (Cr(VI)); (h) Elovich (Cr(VI))

Table S1 Kinetic parameters for adsorption rate expressions

| Anions | $C_0$<br>(mg/L) | $q_{e \text{ exp}}^a$<br>(mg/g) | pseudo first-order         |                    |       | pseudo second-order    |                    |       | Elovich equation       |                   |       |
|--------|-----------------|---------------------------------|----------------------------|--------------------|-------|------------------------|--------------------|-------|------------------------|-------------------|-------|
|        |                 |                                 | $k_1$<br>$\text{min}^{-1}$ | $q_{e1}^b$<br>mg/g | $R^2$ | $k_2$<br>g/(mg<br>min) | $q_{e2}^b$<br>mg/g | $R^2$ | $\alpha$ mg/(g<br>min) | $\beta$<br>(g/mg) | $R^2$ |
| P      | 10              | 2.40                            | 0.062                      | 0.71               | 0.935 | 0.266                  | 2.44               | 0.999 | 203.2                  | 4.55              | 0.904 |
|        | 20              | 4.79                            | 0.078                      | 1.41               | 0.945 | 0.165                  | 4.86               | 0.999 | 262.9                  | 2.13              | 0.918 |
|        | 40              | 9.23                            | 0.037                      | 2.03               | 0.918 | 0.206                  | 9.88               | 0.999 | 61031                  | 1.54              | 0.930 |
| Cr(VI) | 20              | 4.69                            | 0.04                       | 0.84               | 0.831 | 0.234                  | 4.72               | 0.999 | $1.8 \times 10^4$      | 3.28              | 0.917 |
|        | 50              | 11.90                           | 0.05                       | 1.08               | 0.855 | 0.211                  | 11.93              | 0.999 | $1.1 \times 10^{10}$   | 2.34              | 0.878 |
|        | 80              | 19.72                           | 0.06                       | 2.92               | 0.952 | 0.080                  | 19.84              | 0.999 | $2.2 \times 10^7$      | 1.06              | 0.928 |
